# Supplementary material
Source: Springer Nature journal article supplement (https://www.springermedizin.de/resource/supplementary/12894_2002_17_MOESM5_ESM.pdf/9513714)
Supplement: MOESM5 [file 9513714]

**Additional file 5: Absolute total symptom score**

**A. Boyarksy symptom score (0-54)**

| Number of studies        | Time-point (months) | Number of patients |         | Mean symptom score |         | %max score       |         |
|--------------------------|---------------------|--------------------|---------|--------------------|---------|------------------|---------|
|                          |                     | Finasteride 5 mg   | Placebo | Finasteride 5 mg   | Placebo | Finasteride 5 mg | Placebo |
| 2                        | Baseline            | 1719               | 1711    | 14.3               | 14.1    | 26.4             | 26.0    |
| 2                        | 3                   | 1719               | 1711    | 12.6               | 13.8    | 23.4             | 25.5    |
| 2                        | 6                   | 1664               | 1655    | 12.1               | 12.5    | 22.4             | 23.1    |
| 2                        | 12                  | 1689               | 1682    | 11.7               | 12.5    | 21.6             | 23.2    |
| 2                        | 18                  | 1689               | 1682    | 11.4               | 12.8    | 21.1             | 23.6    |
| 2                        | 24                  | 1690               | 1682    | 11.4               | 12.9    | 21.0             | 23.9    |
| 0                        | 36                  | No data            |         |                    |         |                  |         |
| 0                        | 48                  | No data            |         |                    |         |                  |         |
| Mean change at 12 months |                     | 1689               | 1682    | -2.6               | -1.6    | -3.8%            | -2.8%   |
| Mean change at 24 months |                     | 1690               | 1682    | 2.9                | 1.2     | 5.4%             | 2.1%    |

**B. Modified Boyarksy symptom score (0-36)**

| Number of studies        | Time-point (months) | Number of patients |         | Mean symptom score |         | %max score       |         |
|--------------------------|---------------------|--------------------|---------|--------------------|---------|------------------|---------|
|                          |                     | Finasteride 5 mg   | Placebo | Finasteride 5 mg   | Placebo | Finasteride 5 mg | Placebo |
| 9                        | Baseline            | 1060               | 1040    | 14.1               | 13.9    | 39.1             | 38.7    |
| 6                        | 3                   | 1008               | 992     | 12.4               | 12.7    | 34.5             | 35.4    |
| 6                        | 6                   | 998                | 988     | 12.0               | 12.5    | 33.3             | 34.8    |
| 3                        | 12                  | 853                | 858     | 12.2               | 13.4    | 33.8             | 37.3    |
| 1                        | 18                  | Too few data       |         |                    |         |                  |         |
| 2                        | 24                  | Too few data       |         |                    |         |                  |         |
| 0                        | 36                  | No data            |         |                    |         |                  |         |
| 0                        | 48                  | No data            |         |                    |         |                  |         |
| Mean change at 12 months |                     | 853                | 858     | -1.9               | -0.5    | -5.3%            | -1.4%   |
| Mean change at 24 months |                     | 343                | 334     | -0.7               | -13.9   | -2.0%            | 4.1%    |

**C. AUA symptom score (0-35)**

| Number of studies        | Time-point (months) | Number of patients |         | Mean symptom score |         | %max score       |         |
|--------------------------|---------------------|--------------------|---------|--------------------|---------|------------------|---------|
|                          |                     | Finasteride 5 mg   | Placebo | Finasteride 5 mg   | Placebo | Finasteride 5 mg | Placebo |
| 6                        | Baseline            | 3615               | 2402    | 17.2               | 16.0    | 49.1             | 45.6    |
| 4                        | 3                   | 3224               | 2057    | 15.0               | 14.7    | 43.0             | 42.0    |
| 4                        | 6                   | 3224               | 2057    | 14.1               | 14.0    | 40.2             | 40.0    |
| 4                        | 12                  | 3441               | 2220    | 13.5               | 13.7    | 38.5             | 39.2    |
| 1                        | 18                  | 1314               | 1296    | 12.3               | 13.5    | 35.1             | 38.6    |
| 1                        | 24                  | 1153               | 1101    | 12.1               | 13.6    | 34.6             | 38.9    |
| 1                        | 36                  | 1047               | 961     | 12.1               | 13.6    | 34.6             | 38.9    |
| 1                        | 48                  | 985                | 853     | 11.8               | 13.8    | 33.7             | 39.4    |
| Mean change at 12 months |                     | 3441               | 2220    | -3.7               | -2.3    | -10.6%           | -6.4%   |
| Mean change at 24 months |                     | 1153               | 1101    | -5.1               | -2.4    | -14.5%           | -6.2%   |
